# Supplementary material
Source: PubMed Central journal article supplement (PMC5995112)

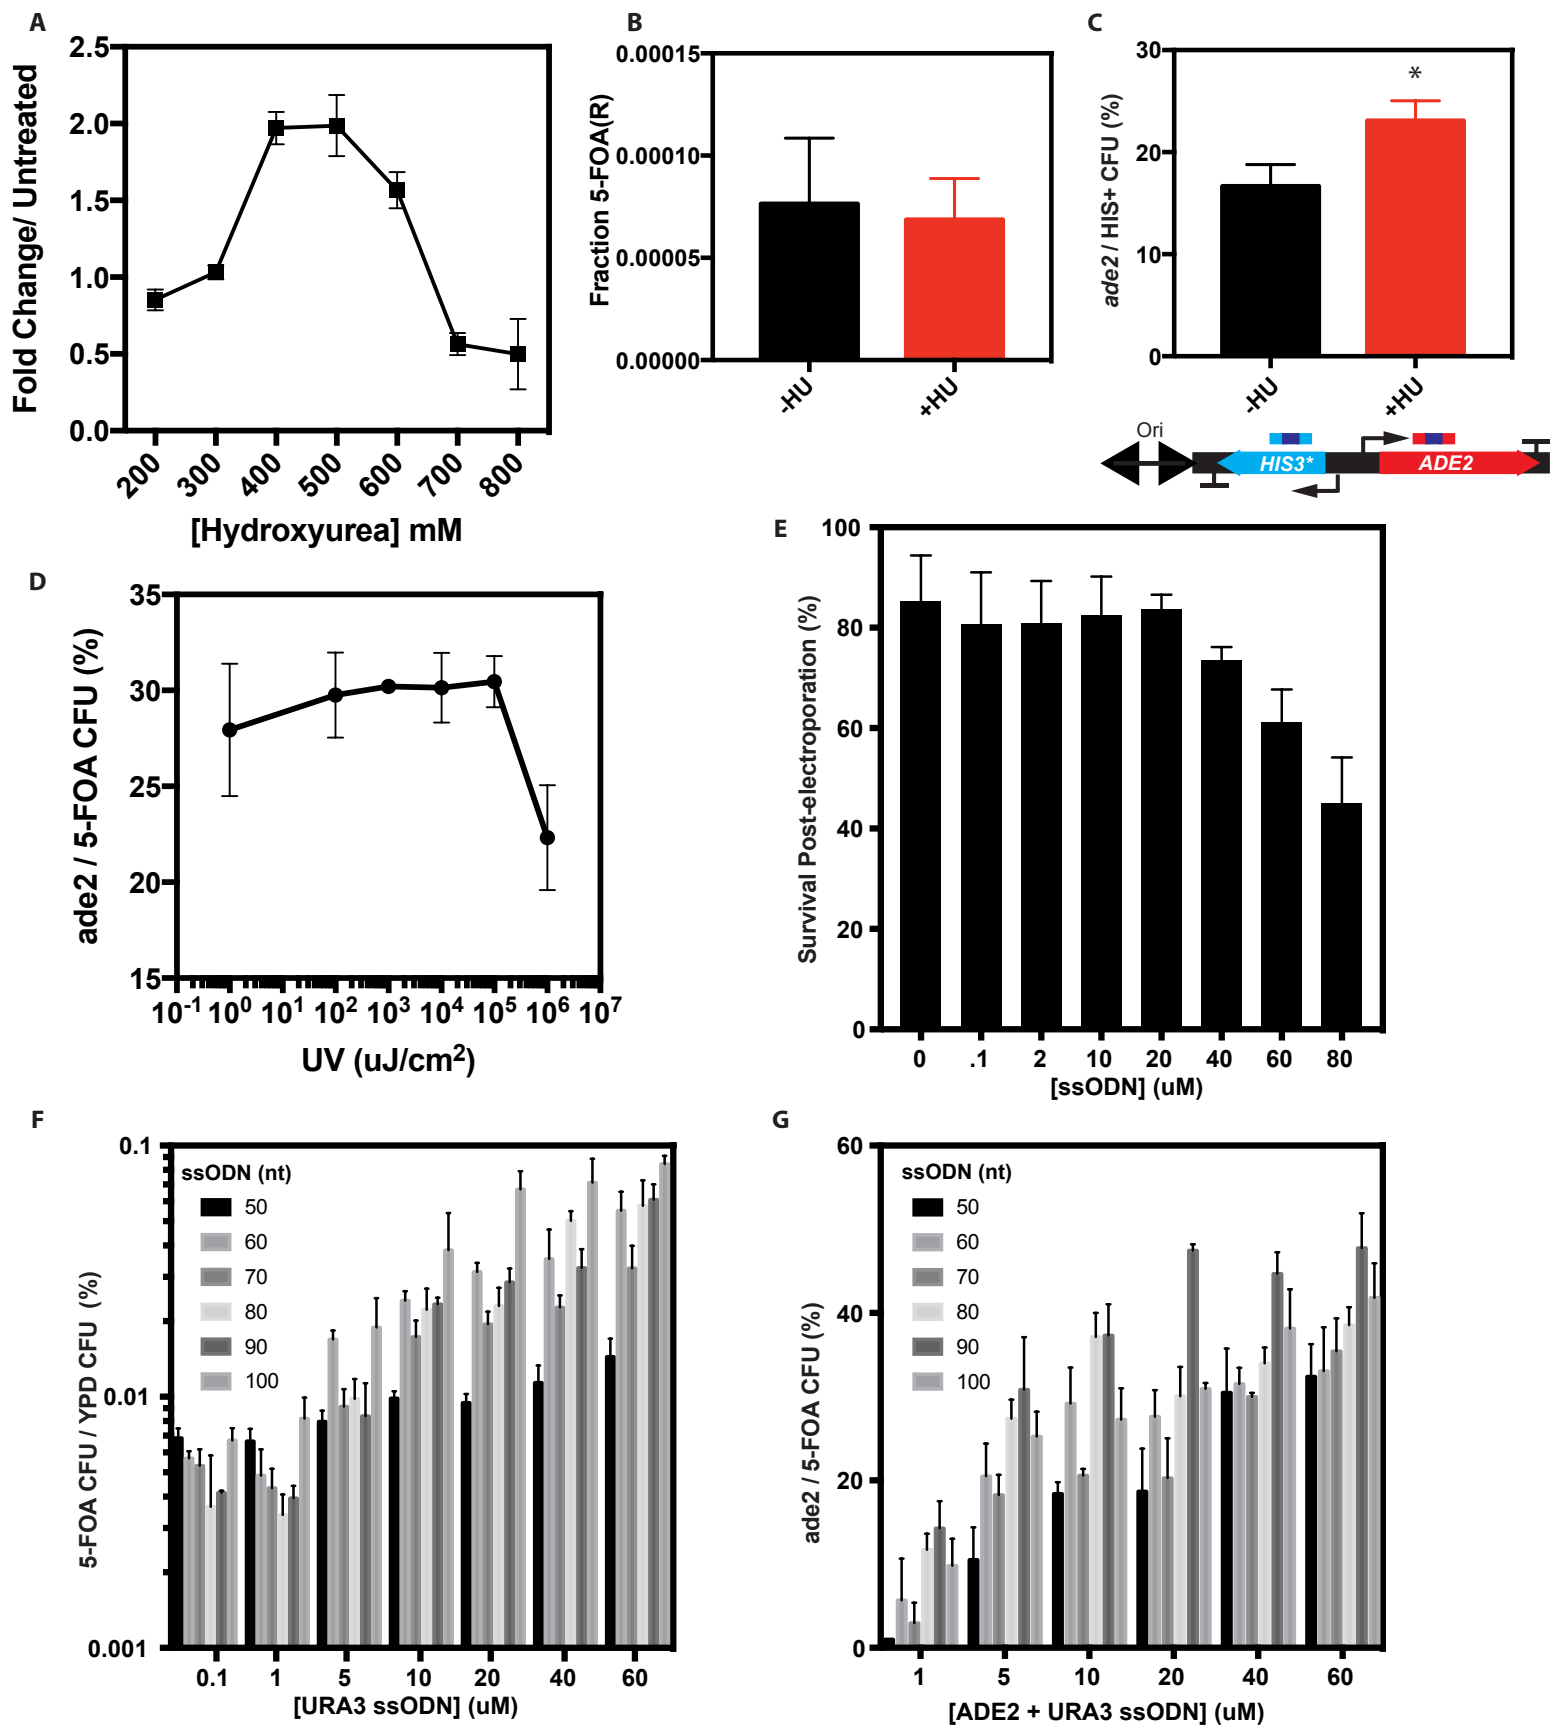

Supplement: NIHMS921657-supplement-2.pdf [file NIHMS921657-supplement-2.pdf]

**A**

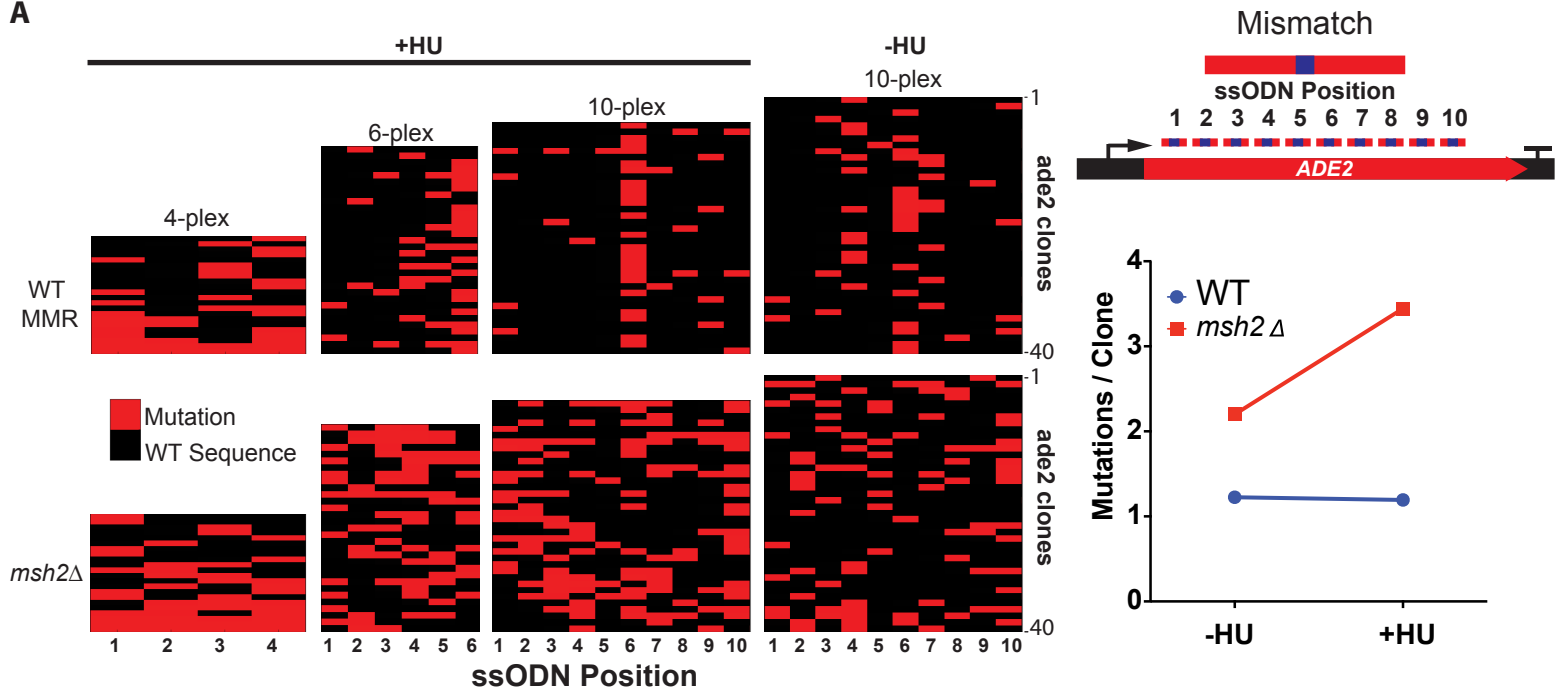

**B**

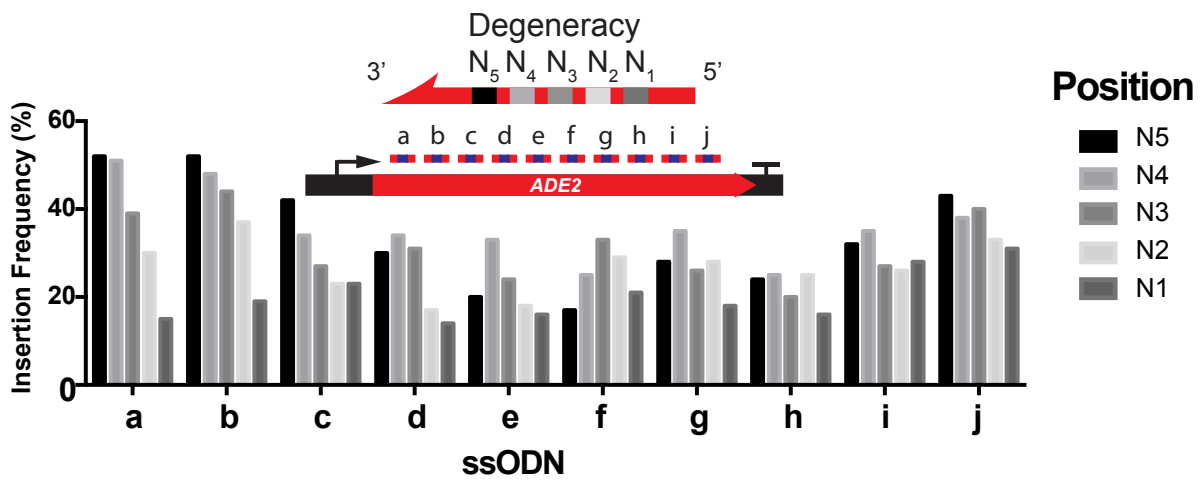

**C**

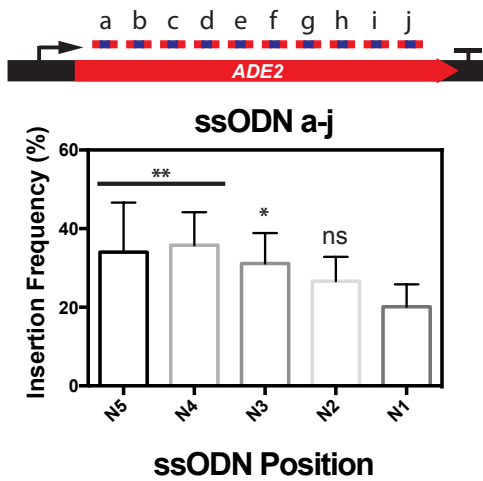

**D**

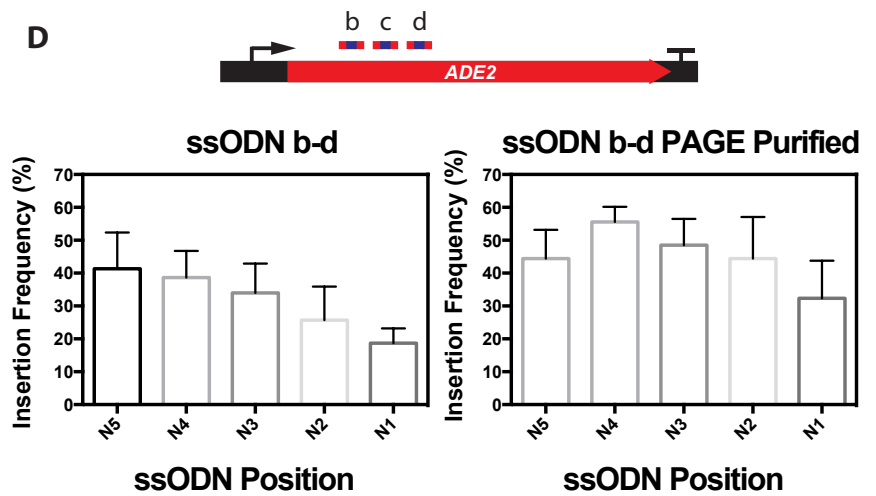

Supplement: NIHMS921657-supplement-3.pdf [file NIHMS921657-supplement-3.pdf]

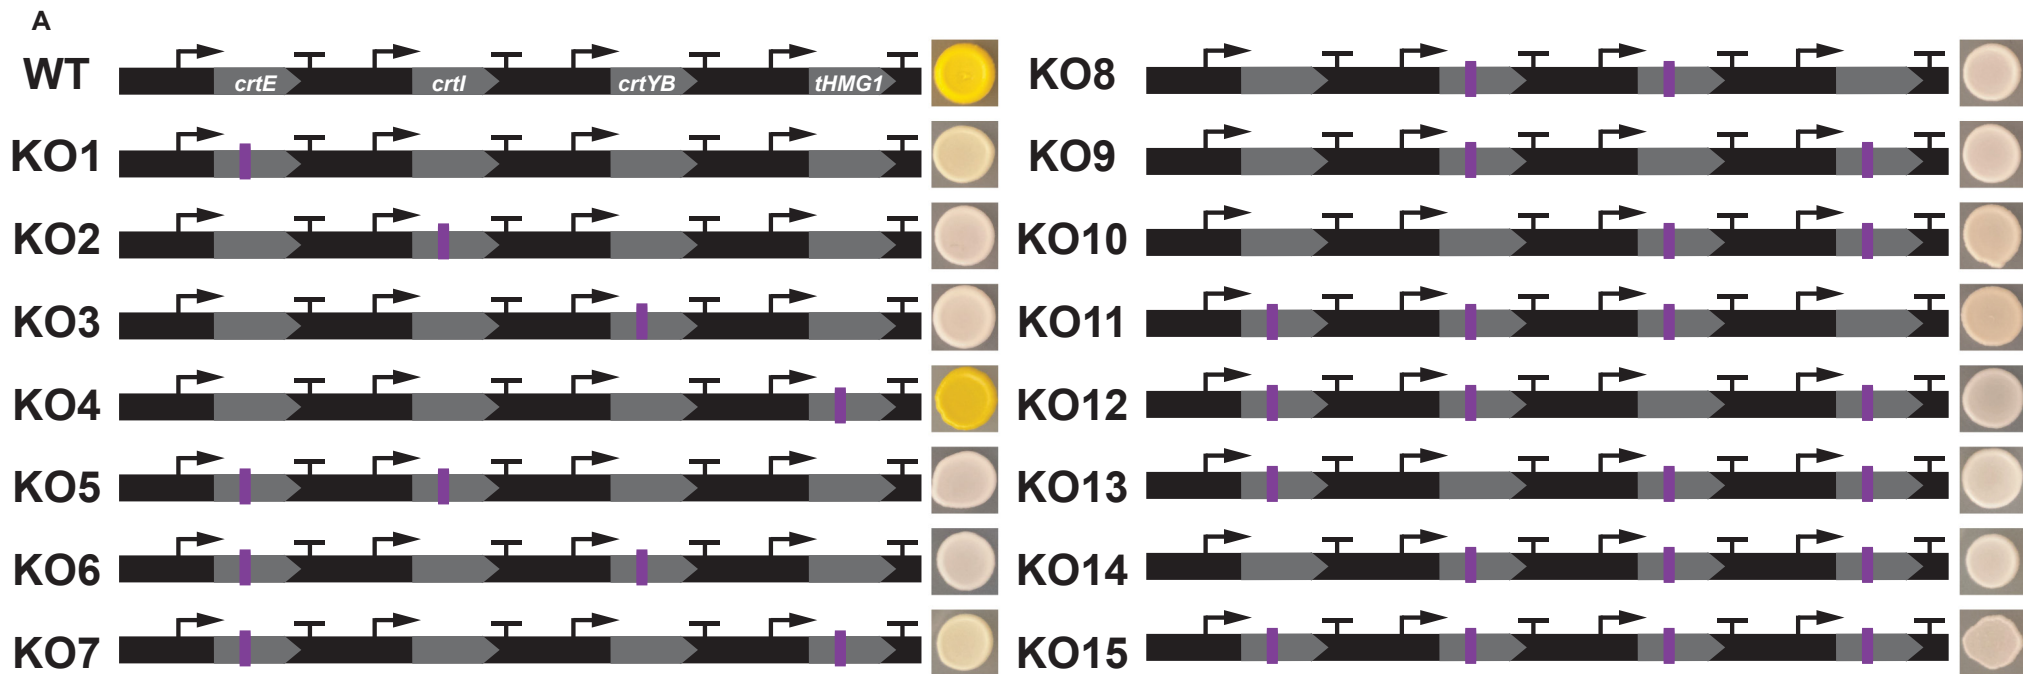

**B**

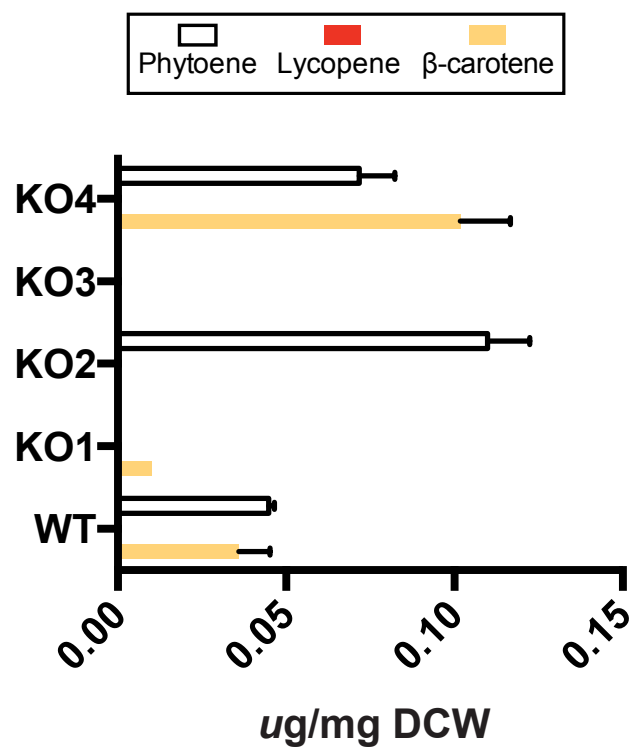

**C**

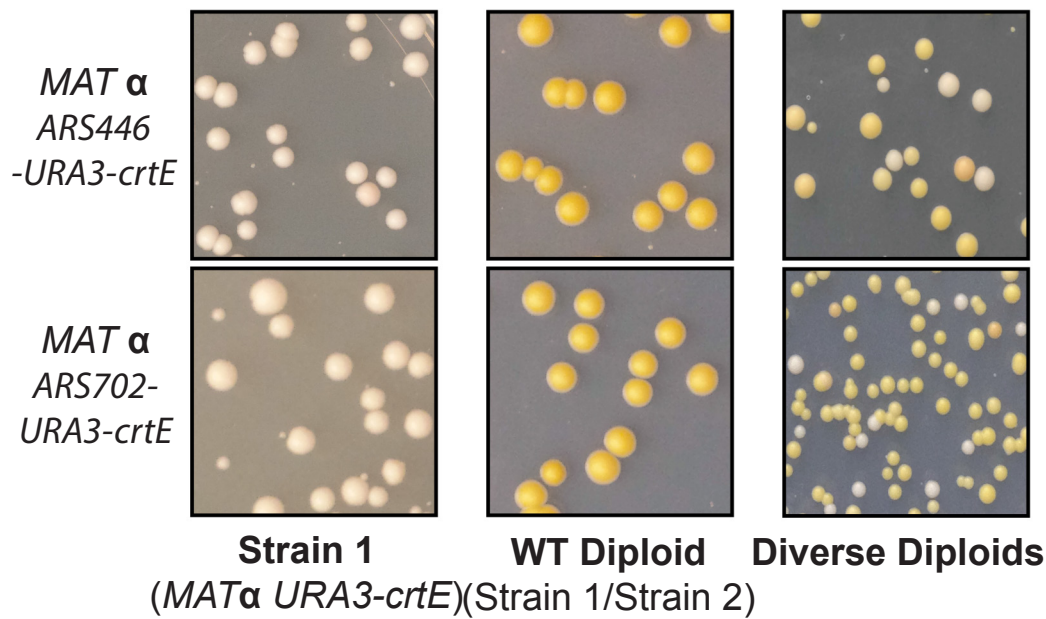

Supplement: NIHMS921657-supplement-5.pdf [file NIHMS921657-supplement-5.pdf]

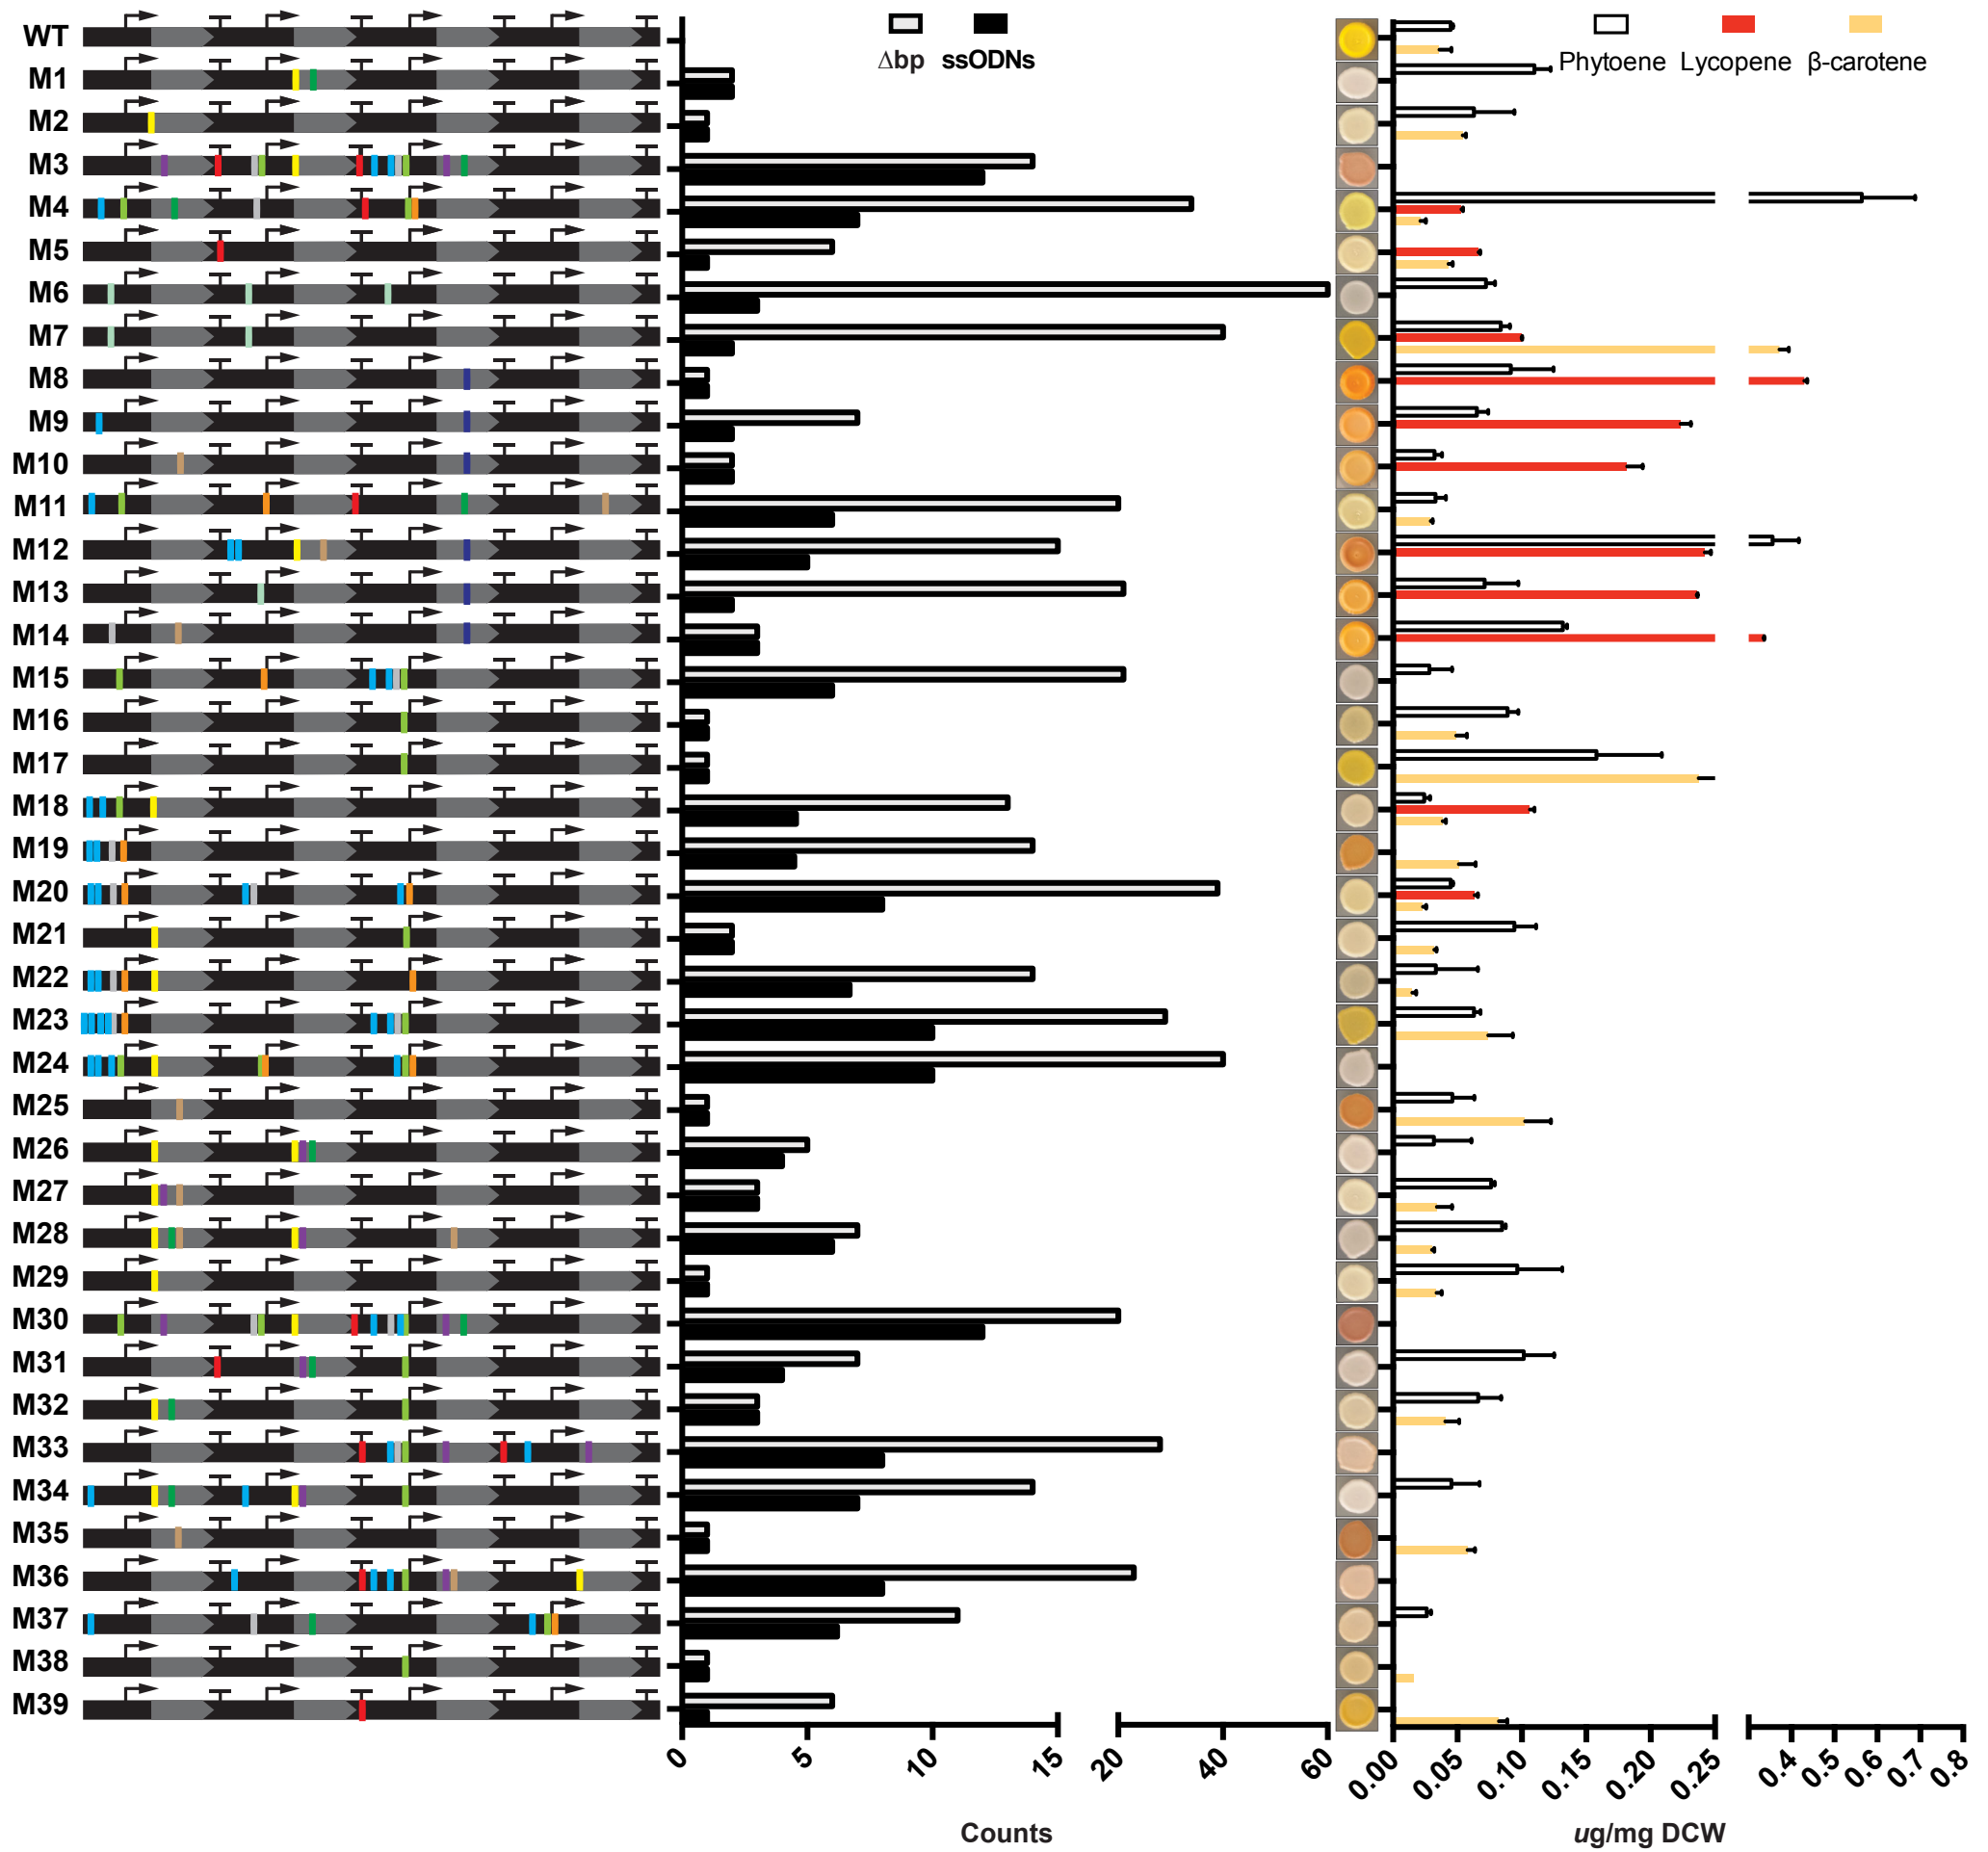

Supplement: NIHMS921657-supplement-6.pdf [file NIHMS921657-supplement-6.pdf]

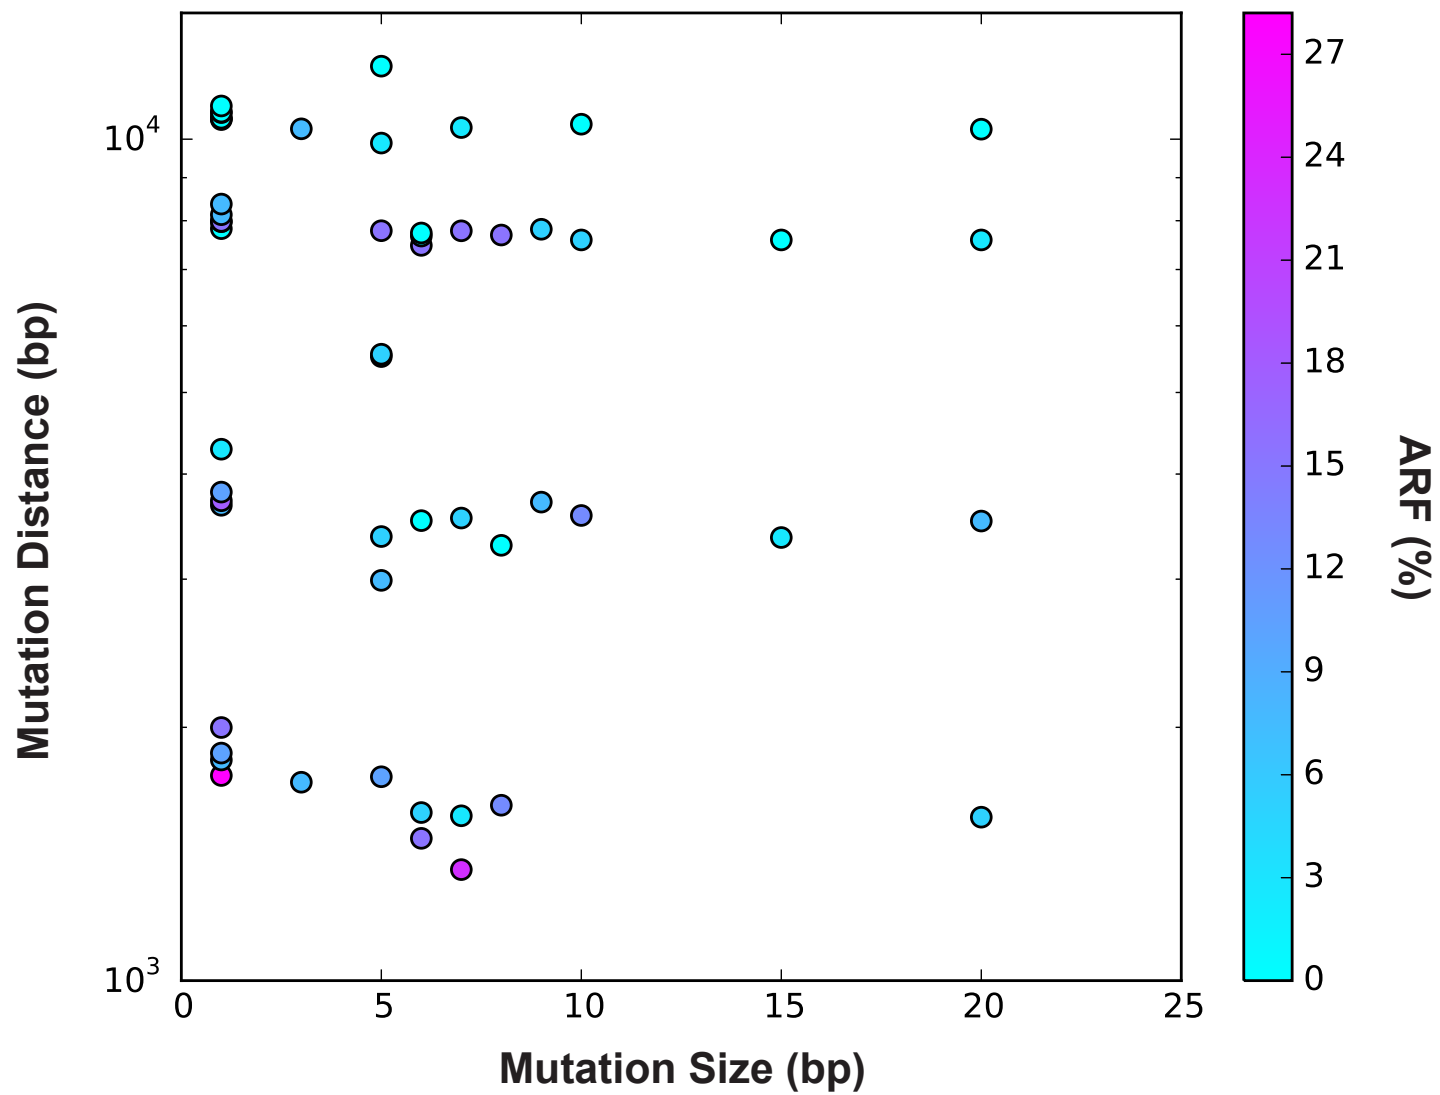

Supplement: NIHMS921657-supplement-7.pdf [file NIHMS921657-supplement-7.pdf]
